# Supplementary figures and images for: Pure and Sc-doped diopside (CaMgSi2O6) vibrational spectra: modelling and experiments
Source: Royal Society of Chemistry journal article supplement (doi:10.1039/d3cp02324a), 2023-12-27

Distribution

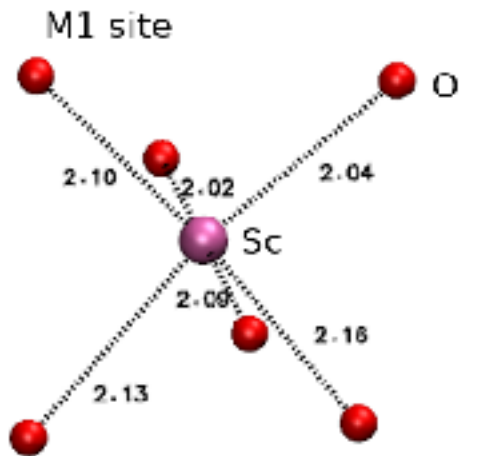— M1 Si=O::Sc<sup>3+</sup>

1 1,1 1,2 1,3 1,4 1,5 1,6 1,7 1,8 1,9 2 2,1 2,2 2,3 2,4 2,5 2,6 2,7 2,8

Distance (Å)

Supplement: d3cp02324a10.pdf [file d3cp02324a10.pdf]

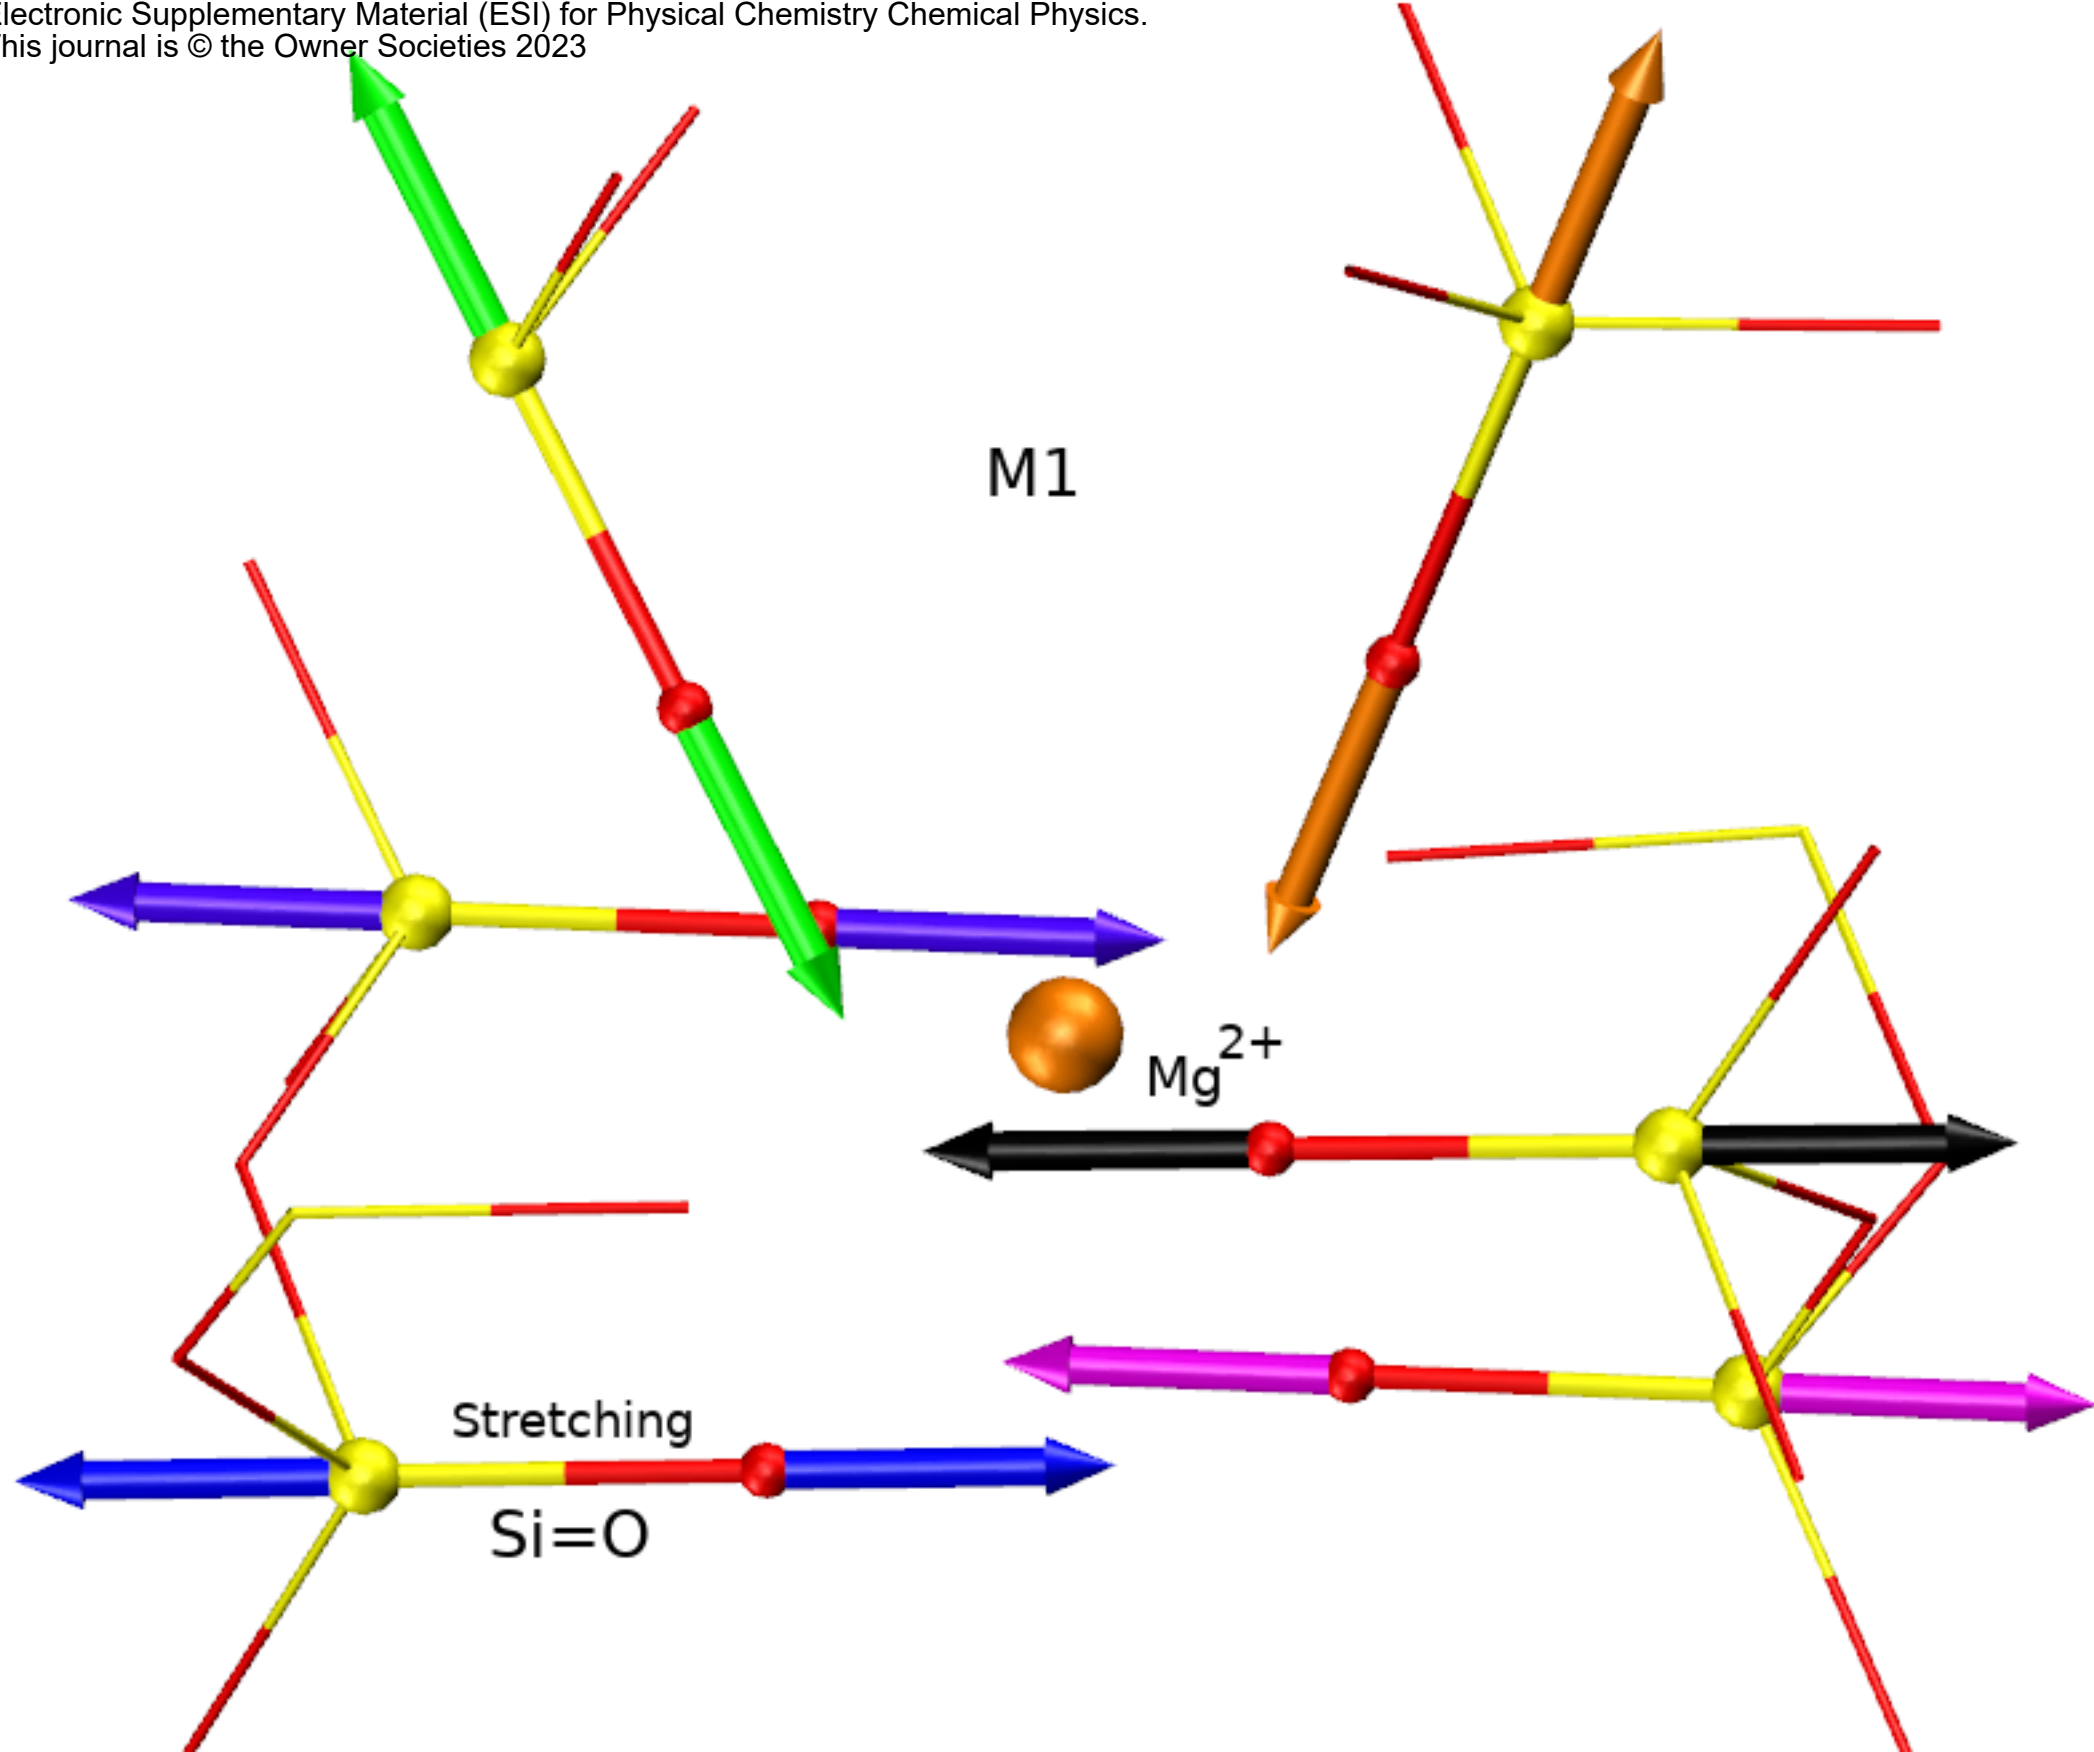

Supplement: d3cp02324a12.pdf [file d3cp02324a12.pdf]

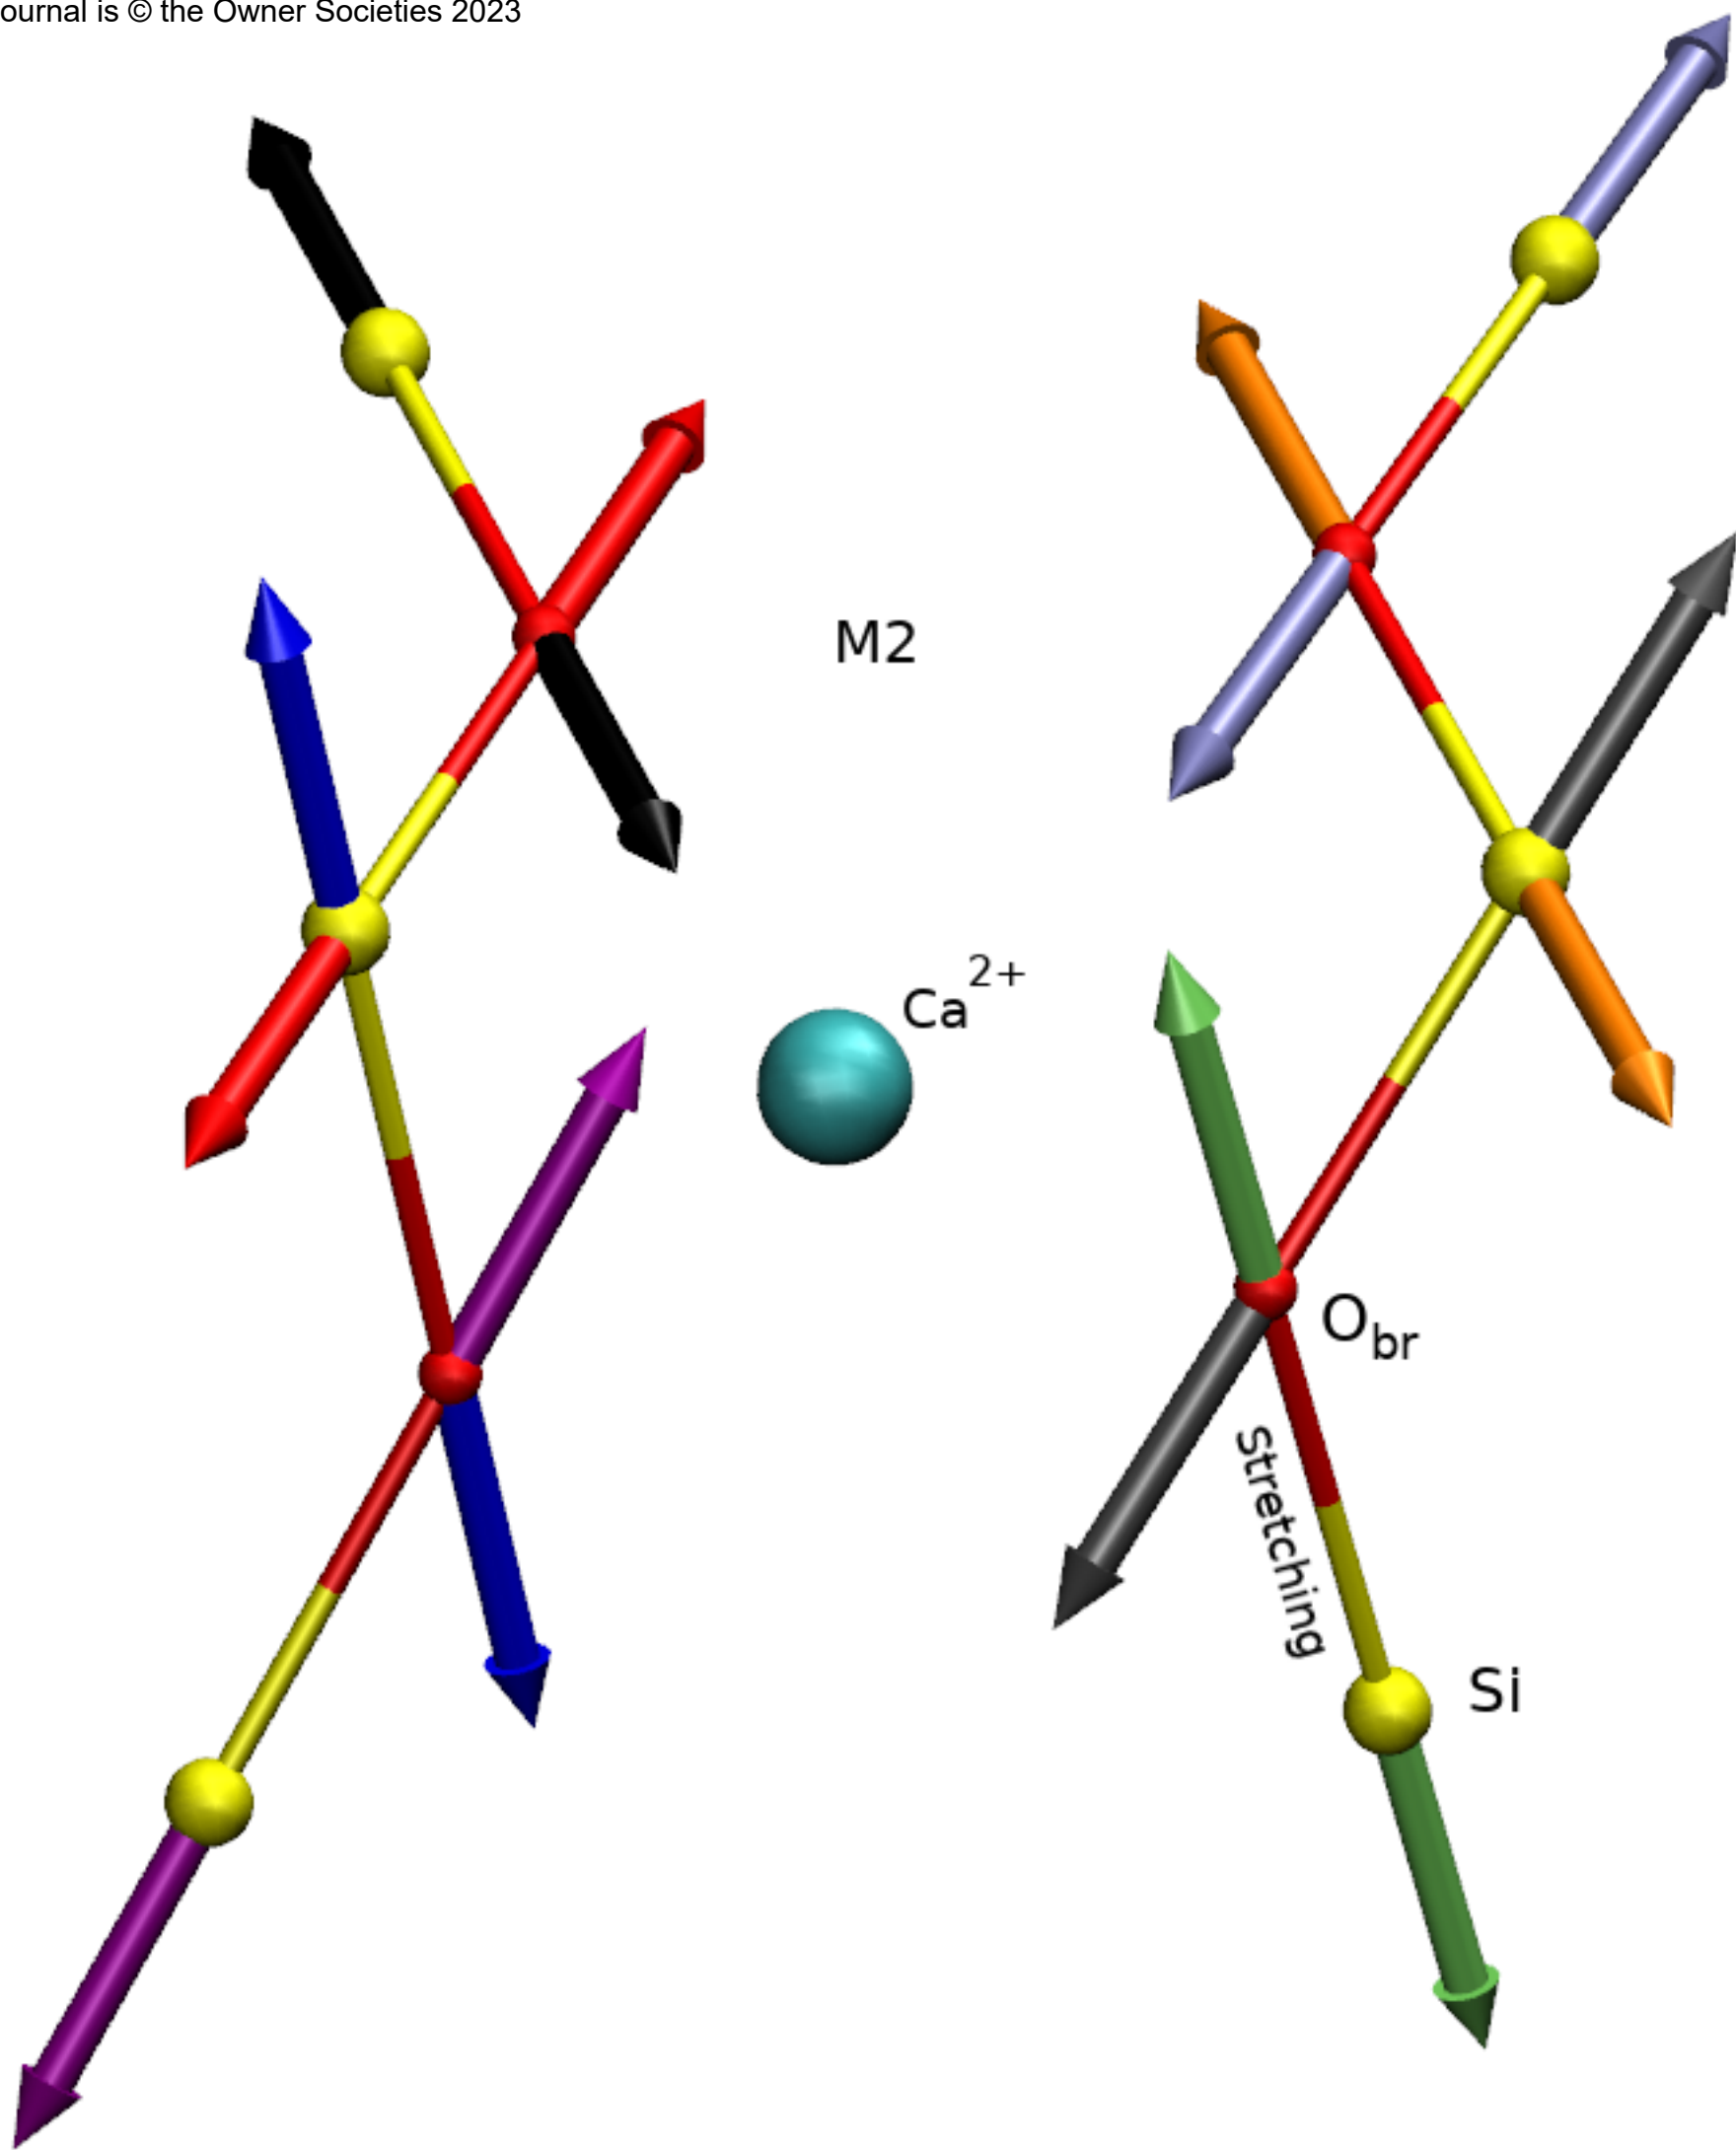

Supplement: d3cp02324a14.pdf [file d3cp02324a14.pdf]

# MD Simulation

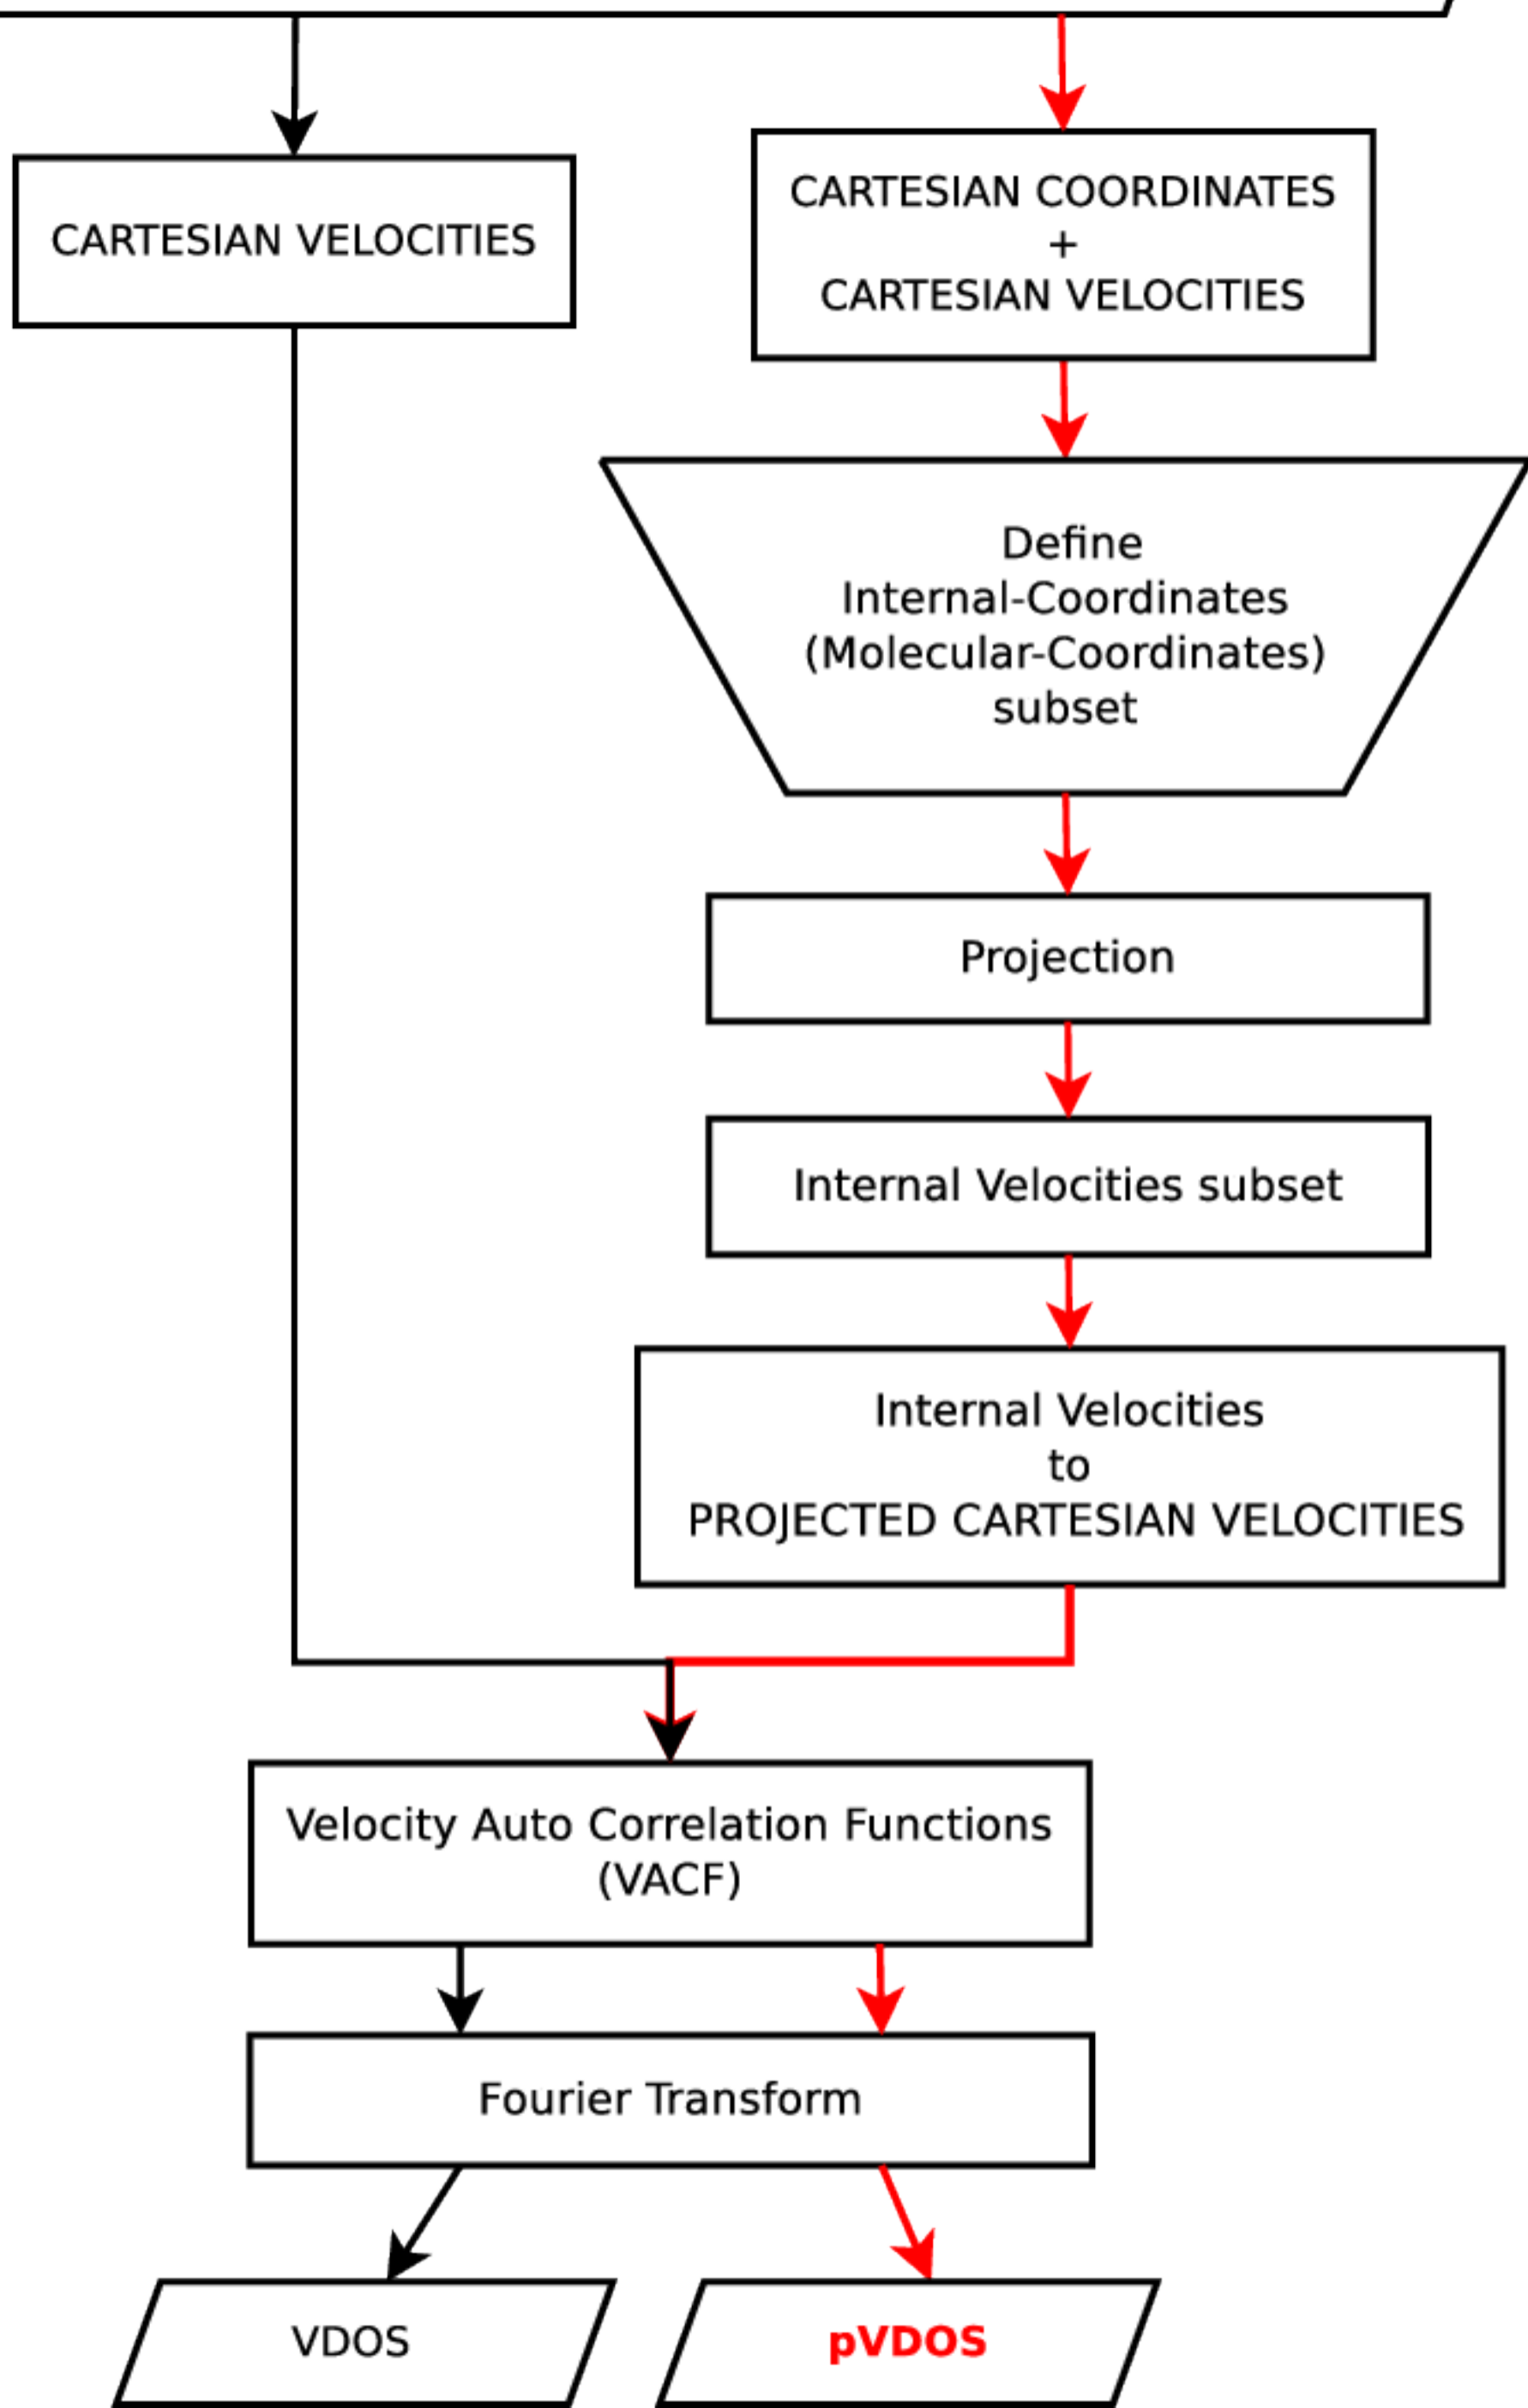

Supplement: d3cp02324a16.pdf [file d3cp02324a16.pdf]

# Pristine

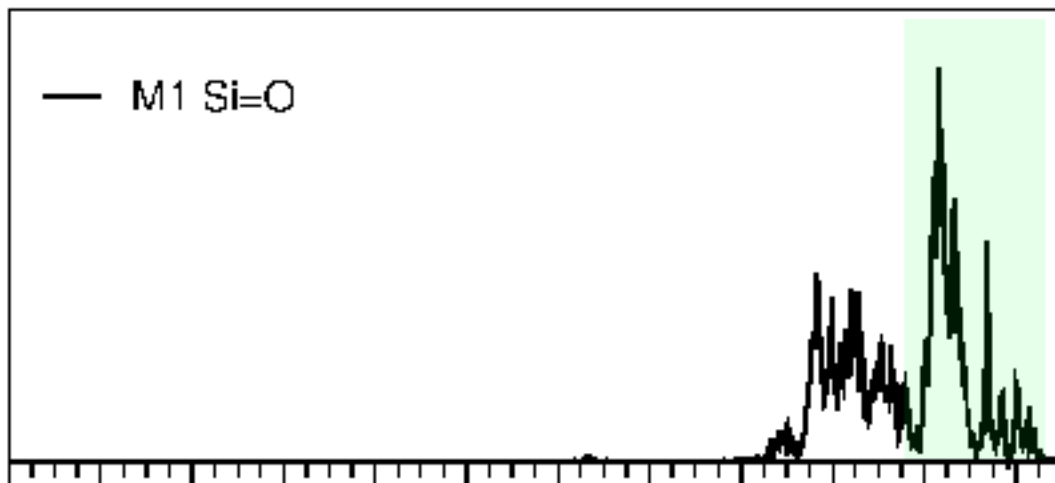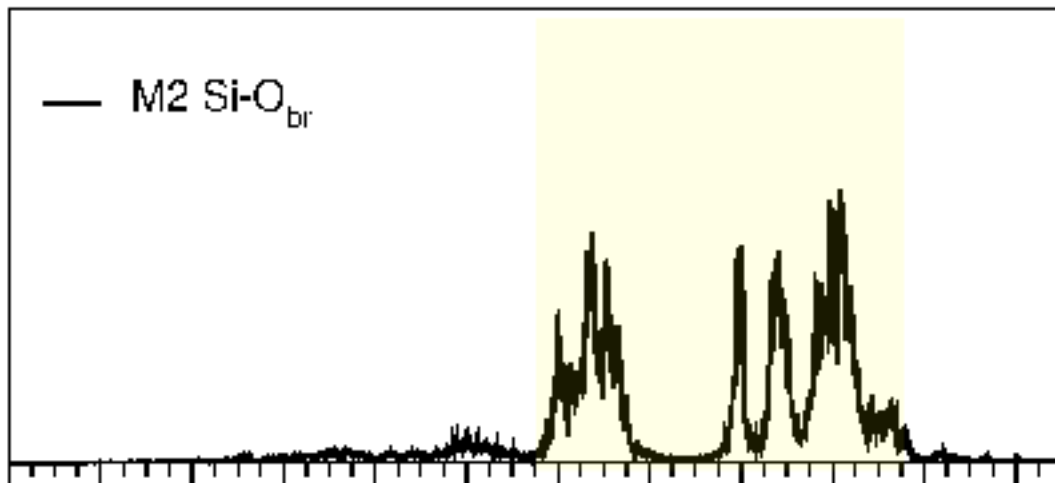

# Sc-doped

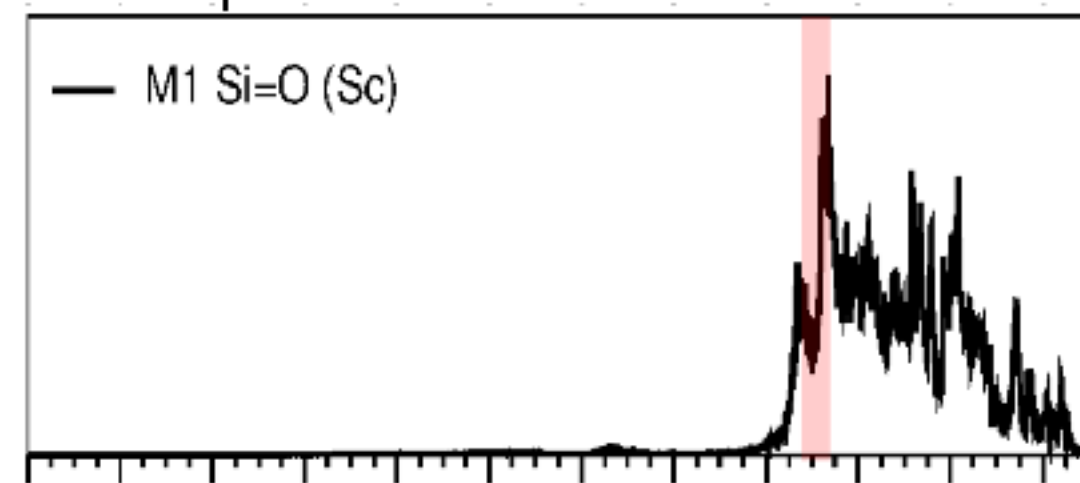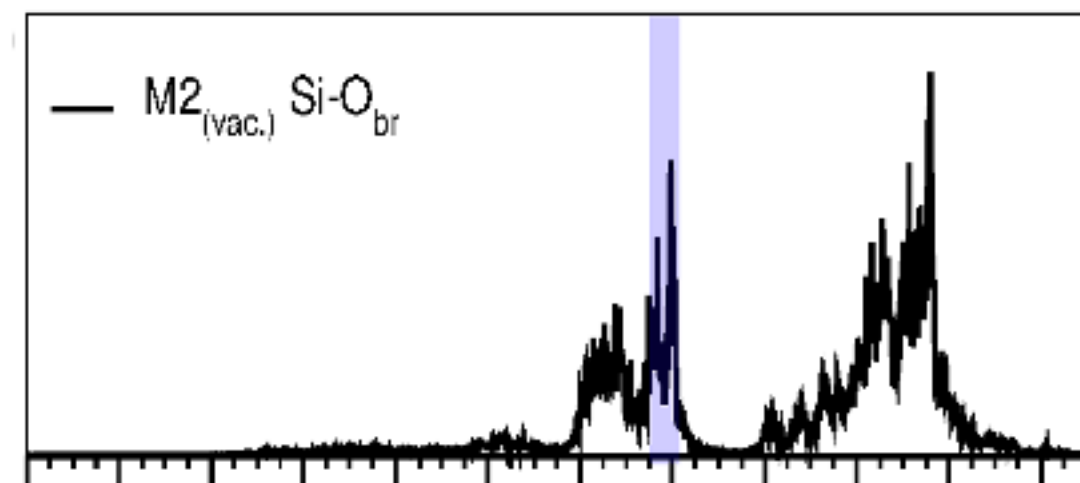

Supplement: d3cp02324a18.pdf [file d3cp02324a18.pdf]

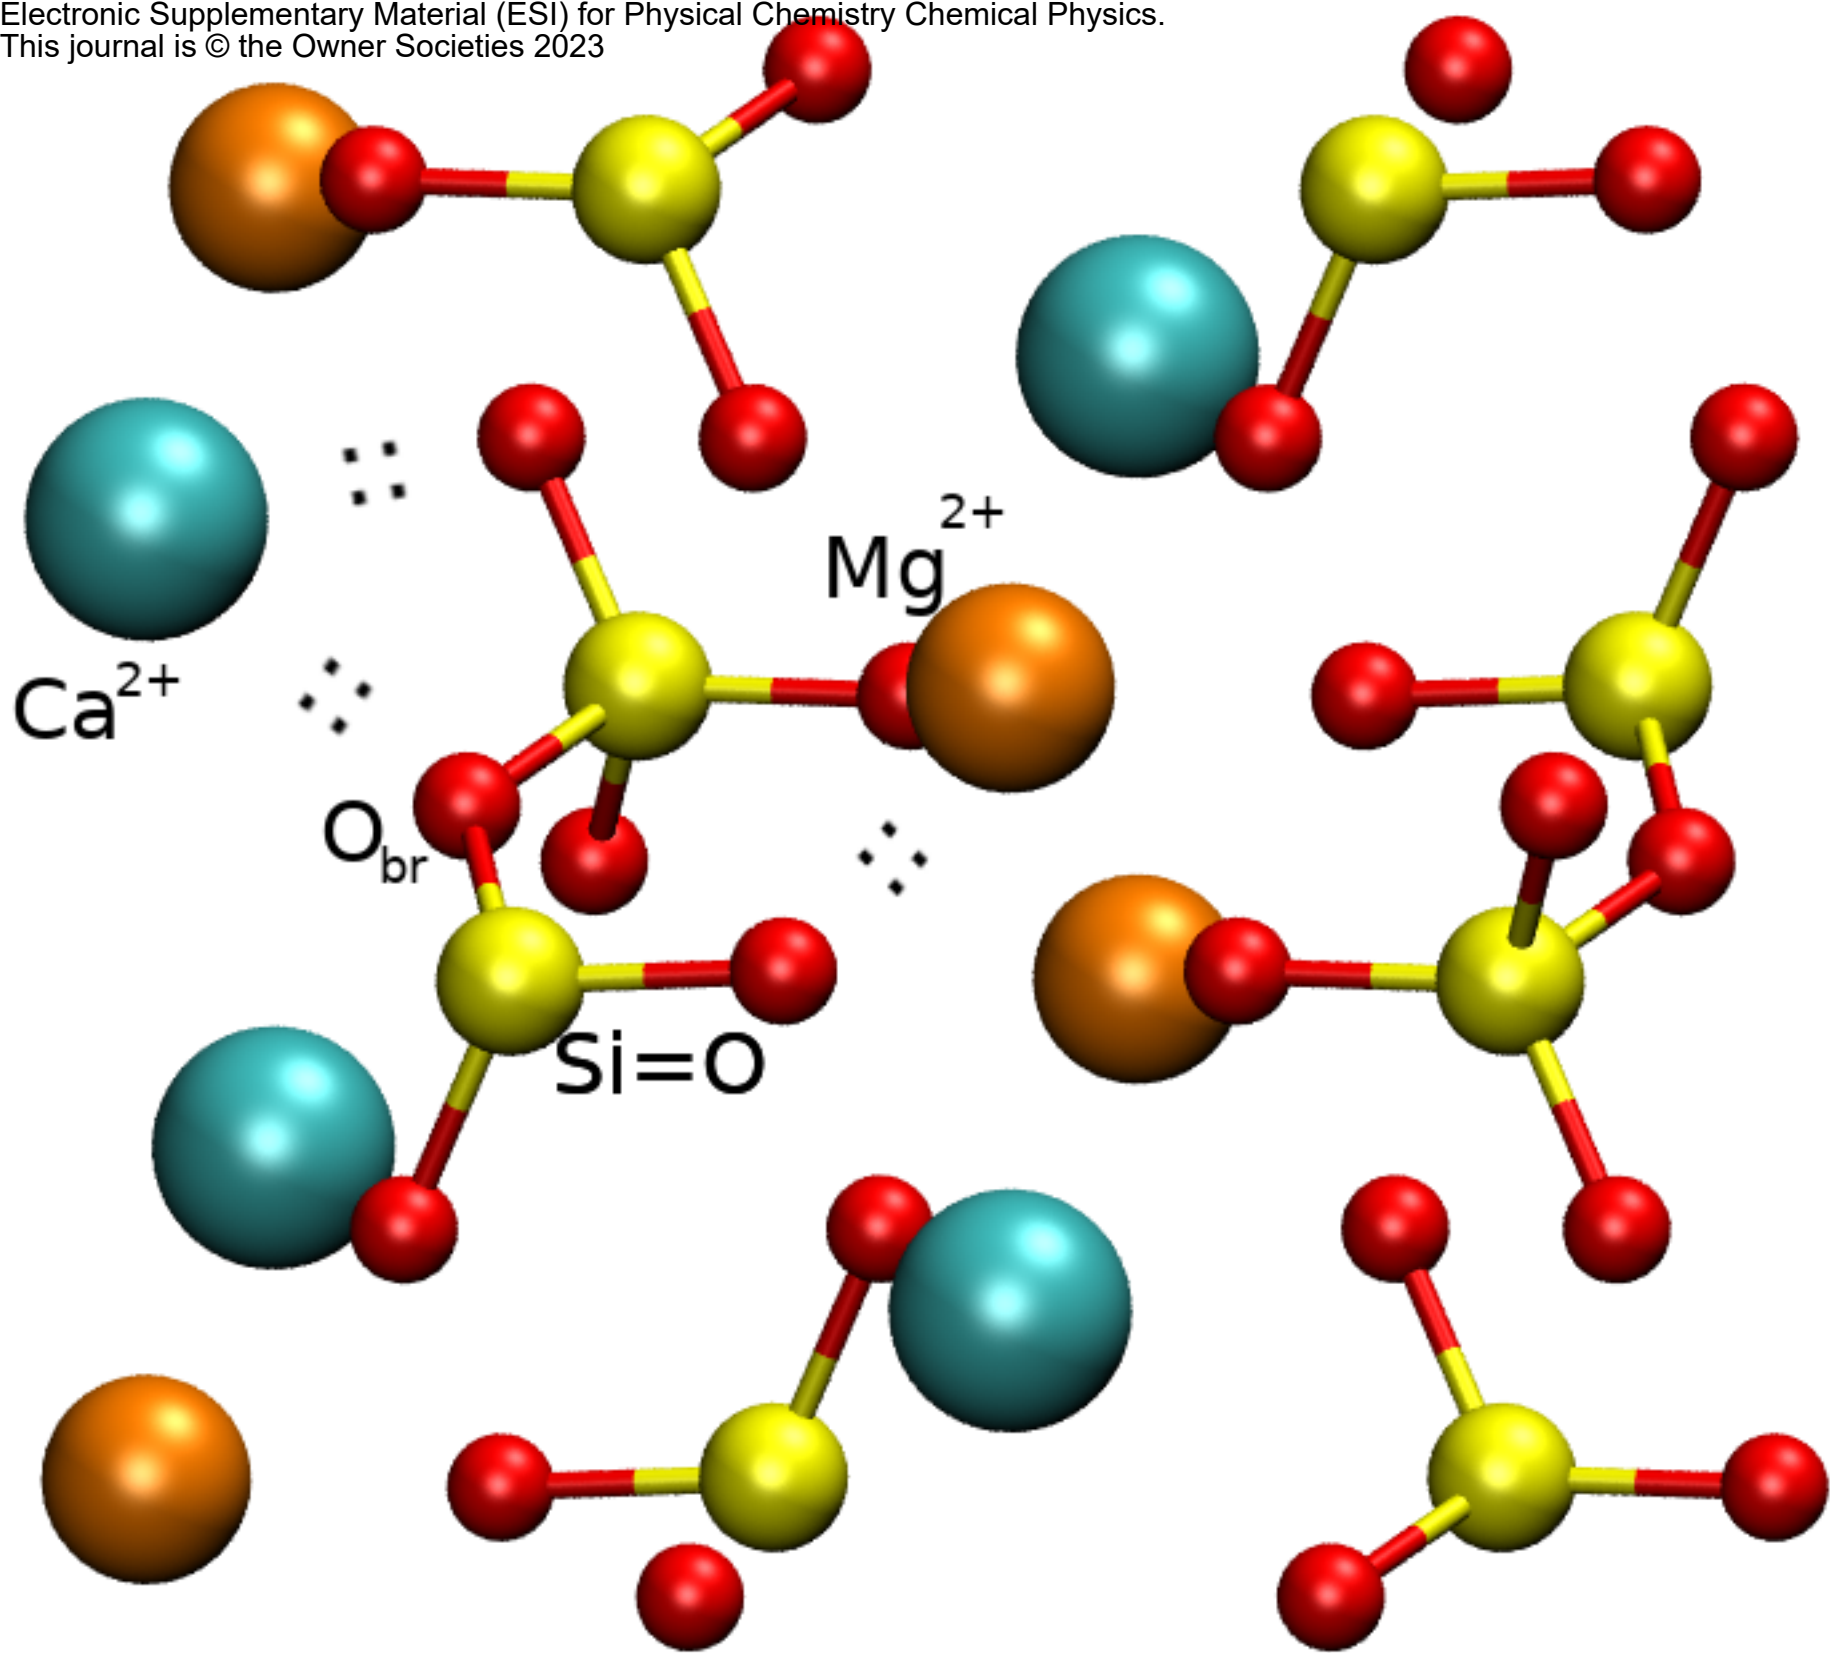

Supplement: d3cp02324a2.pdf [file d3cp02324a2.pdf]

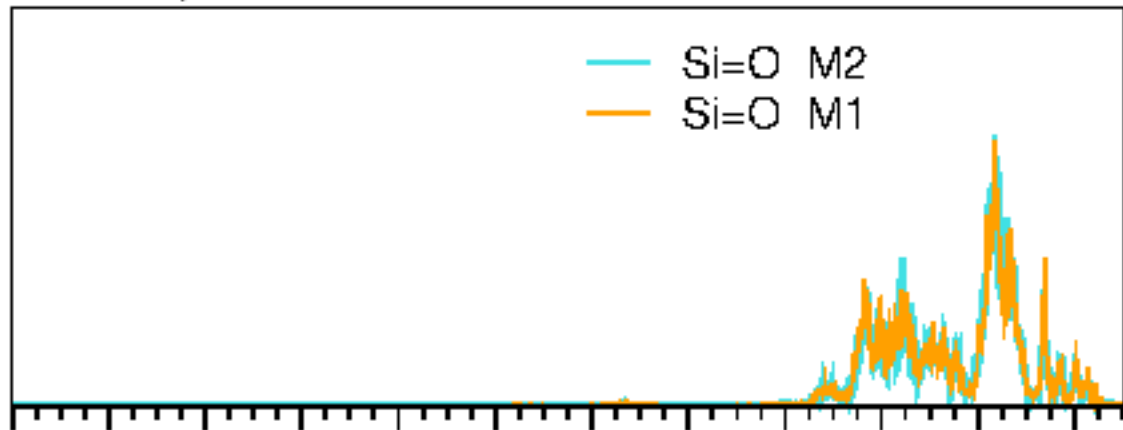

### Sc-Doped diopside

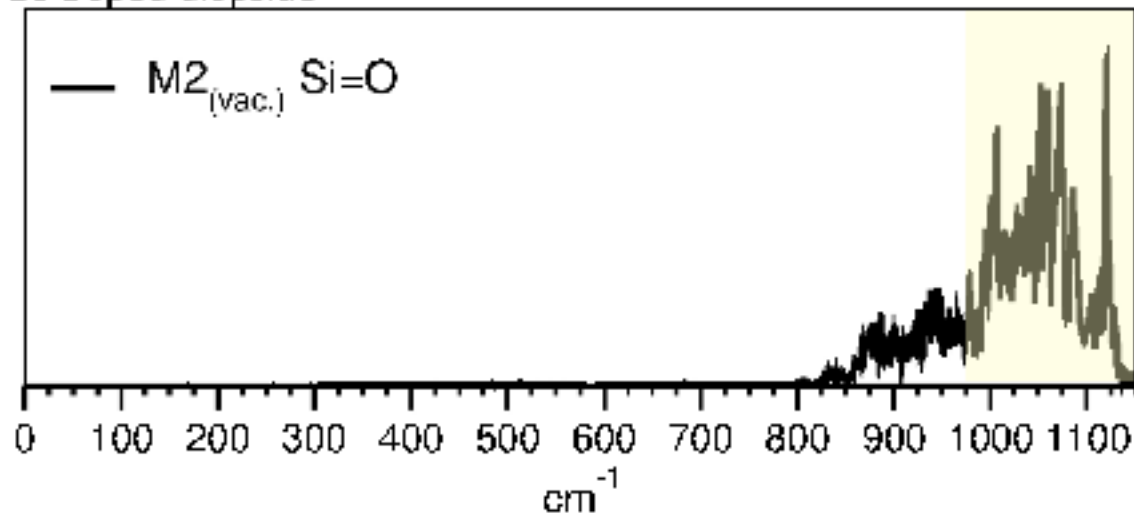

Supplement: d3cp02324a20.pdf [file d3cp02324a20.pdf]

— Diopside  
— Sc-Diopside

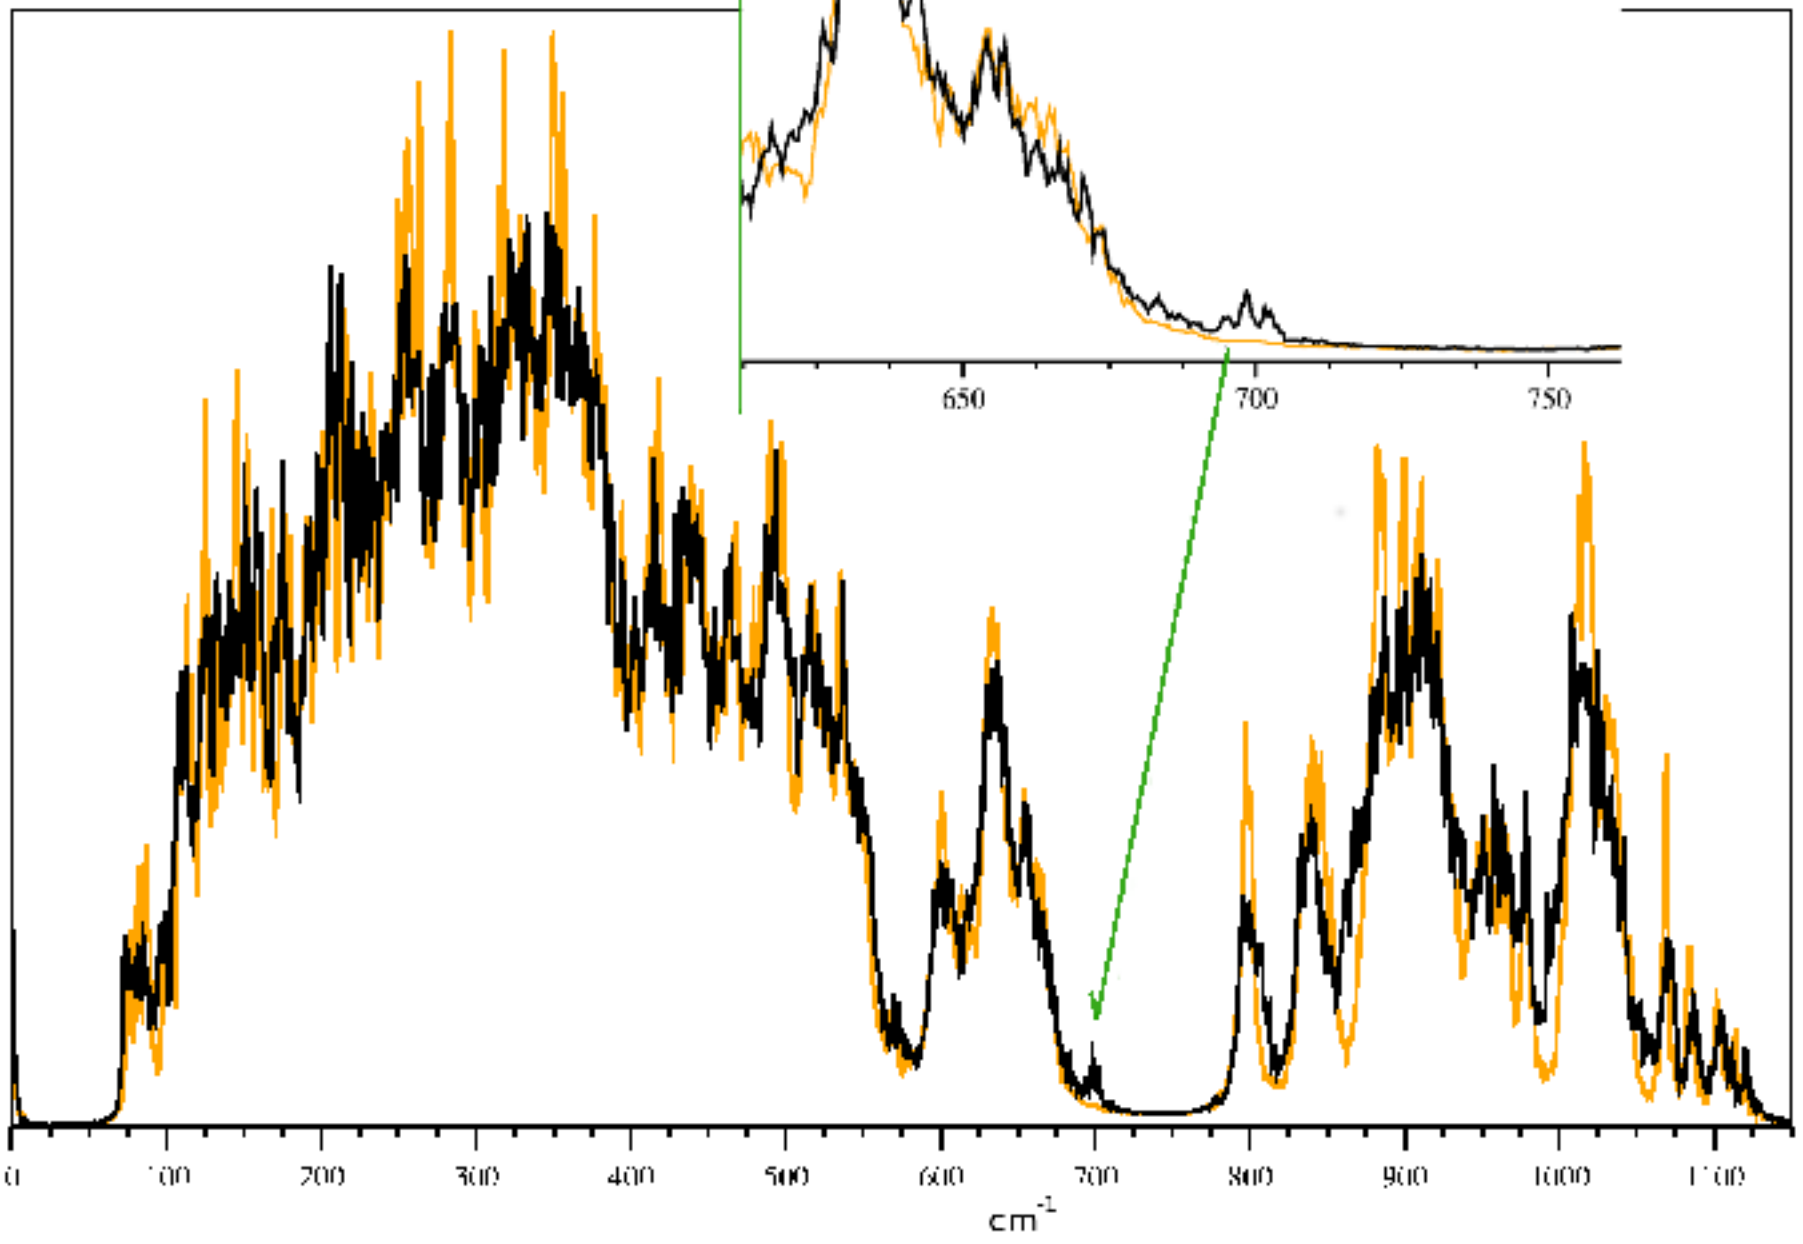

Supplement: d3cp02324a22.pdf [file d3cp02324a22.pdf]

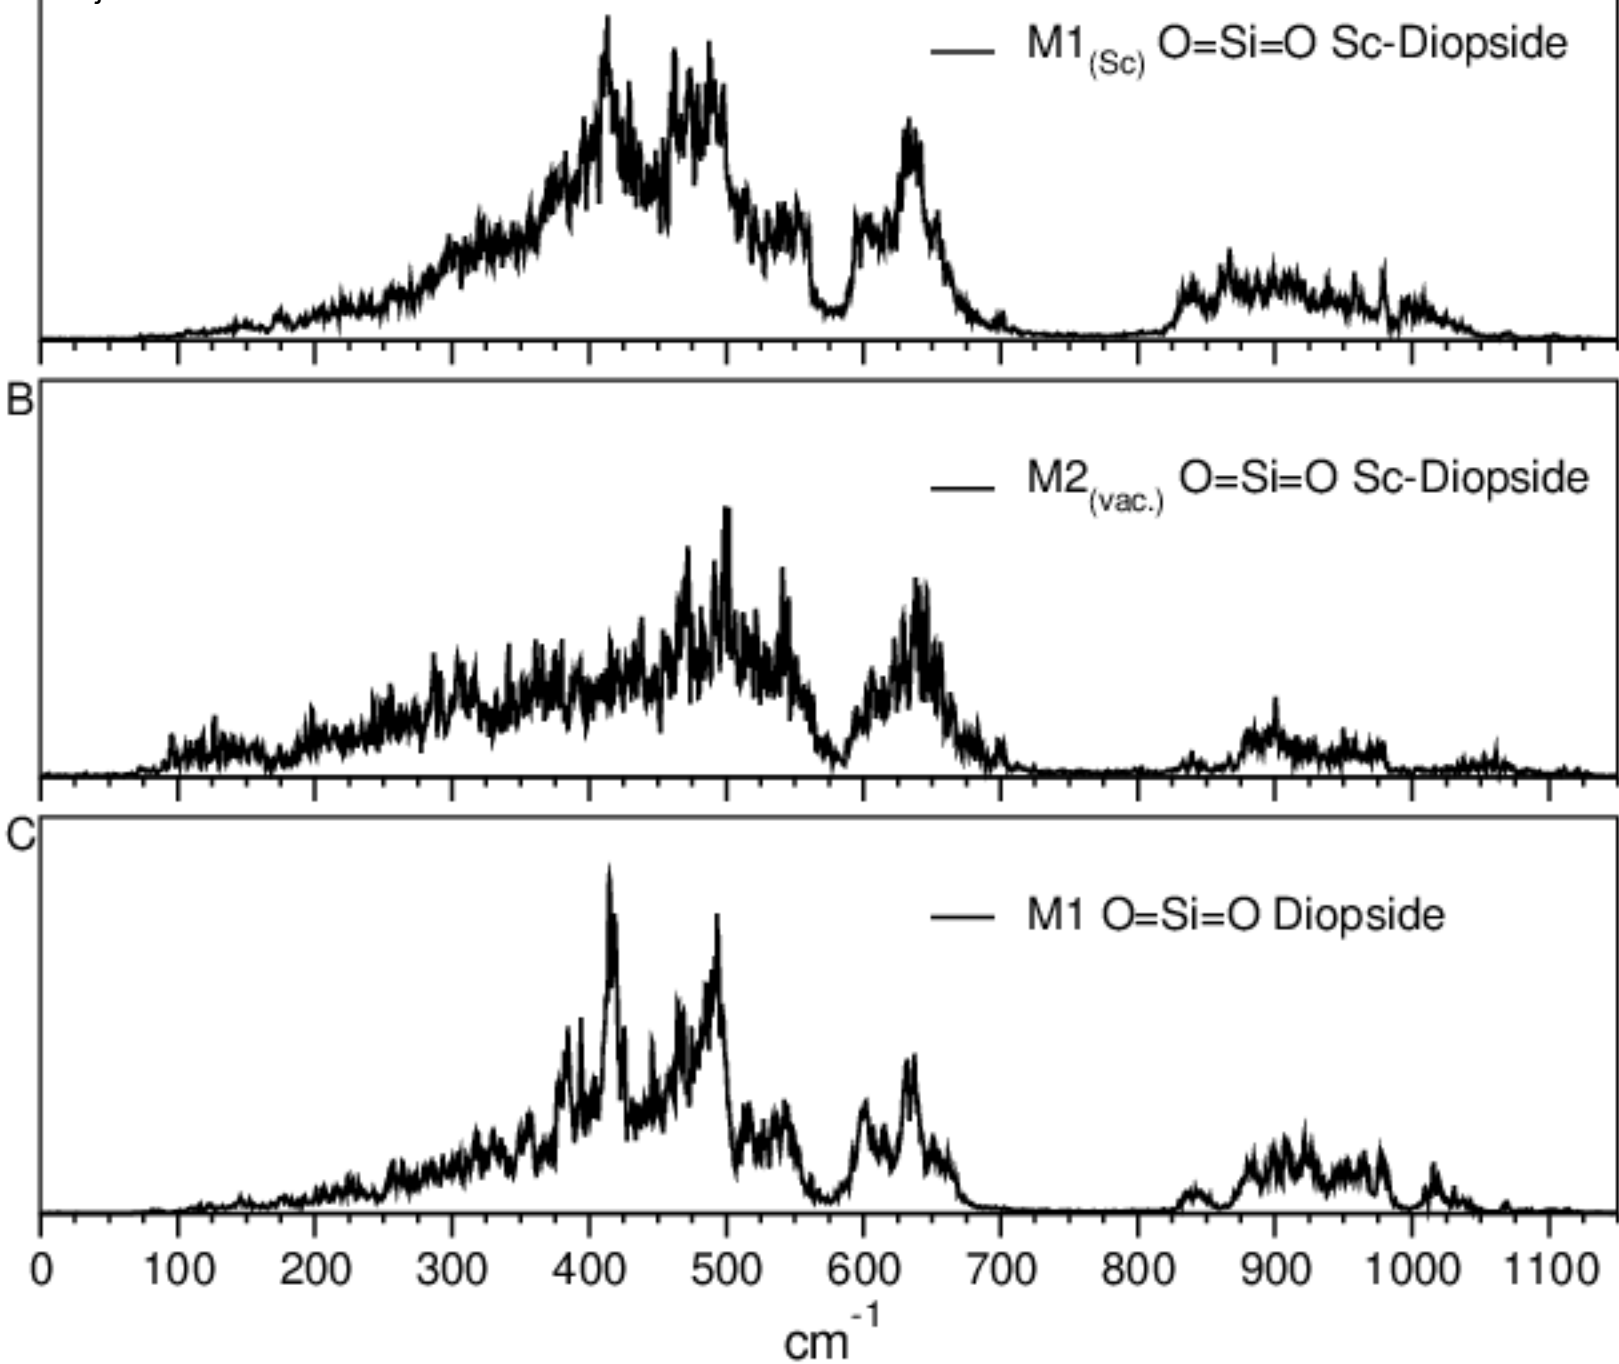

Supplement: d3cp02324a4.pdf [file d3cp02324a4.pdf]

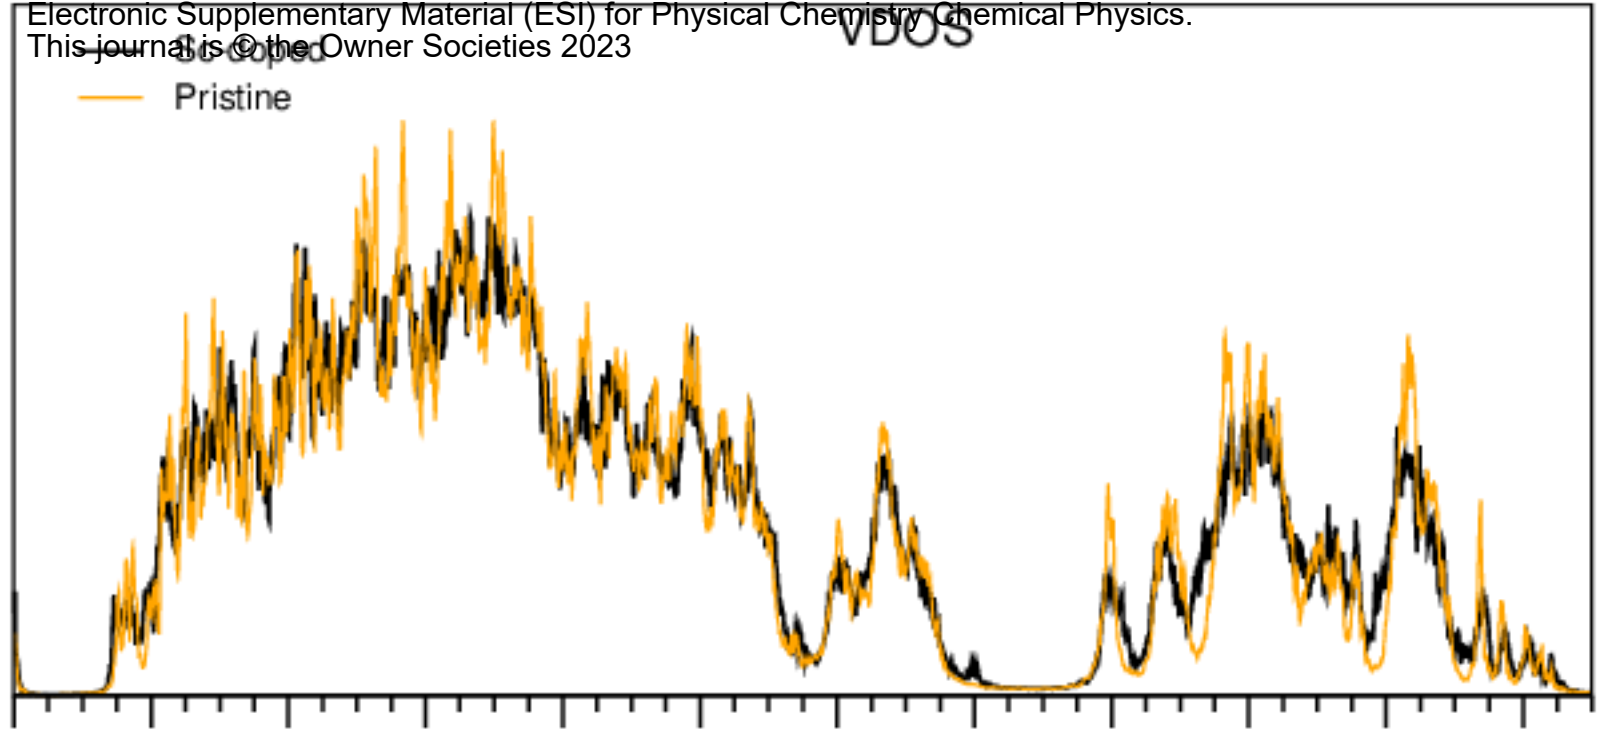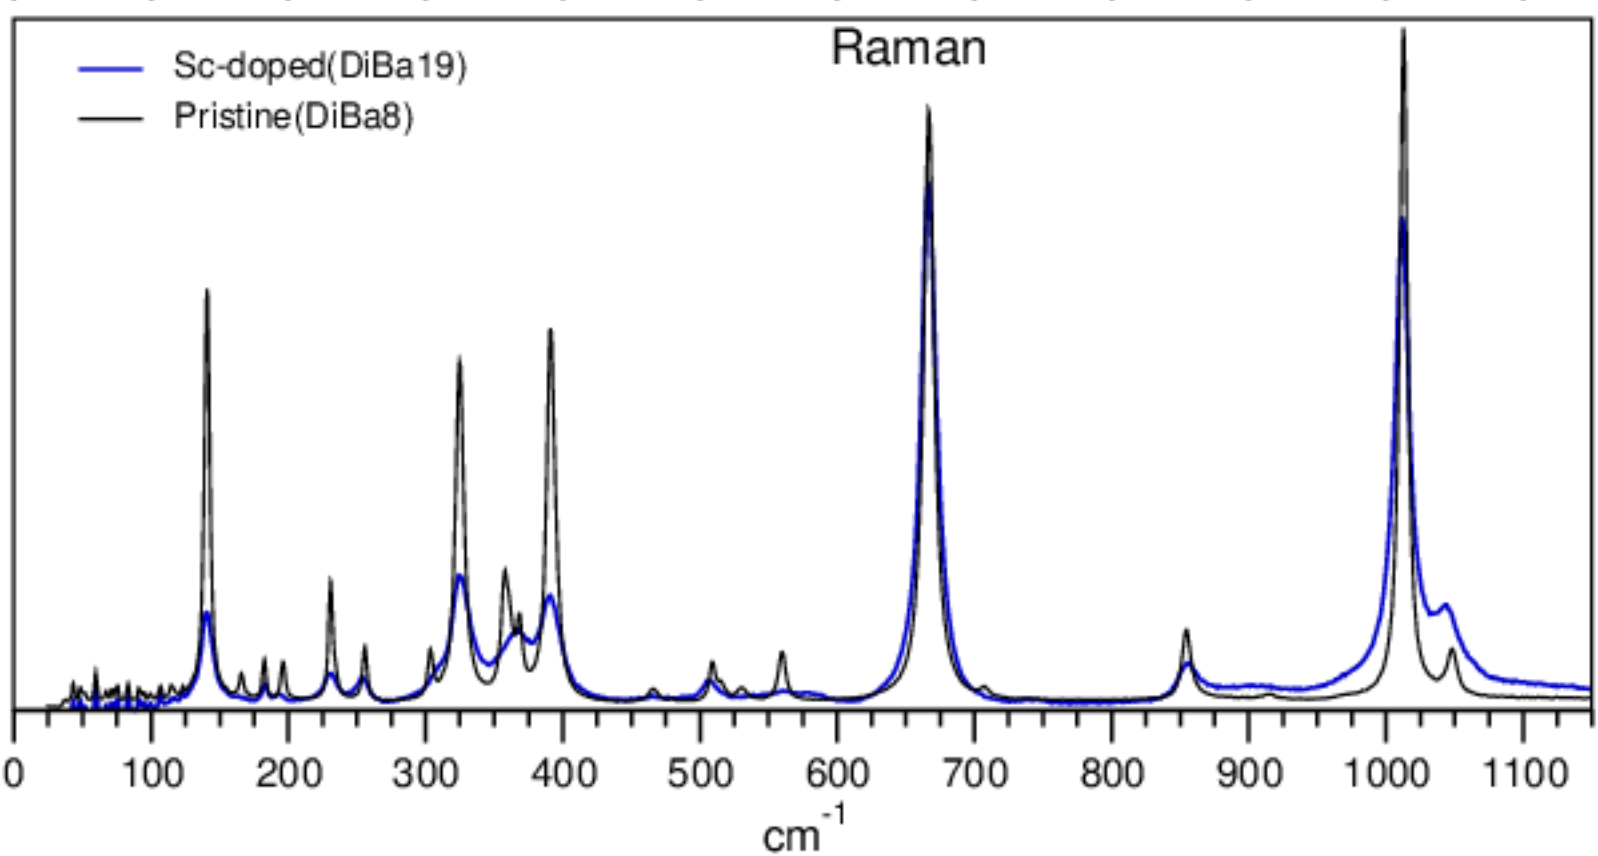

Supplement: d3cp02324a6.pdf [file d3cp02324a6.pdf]

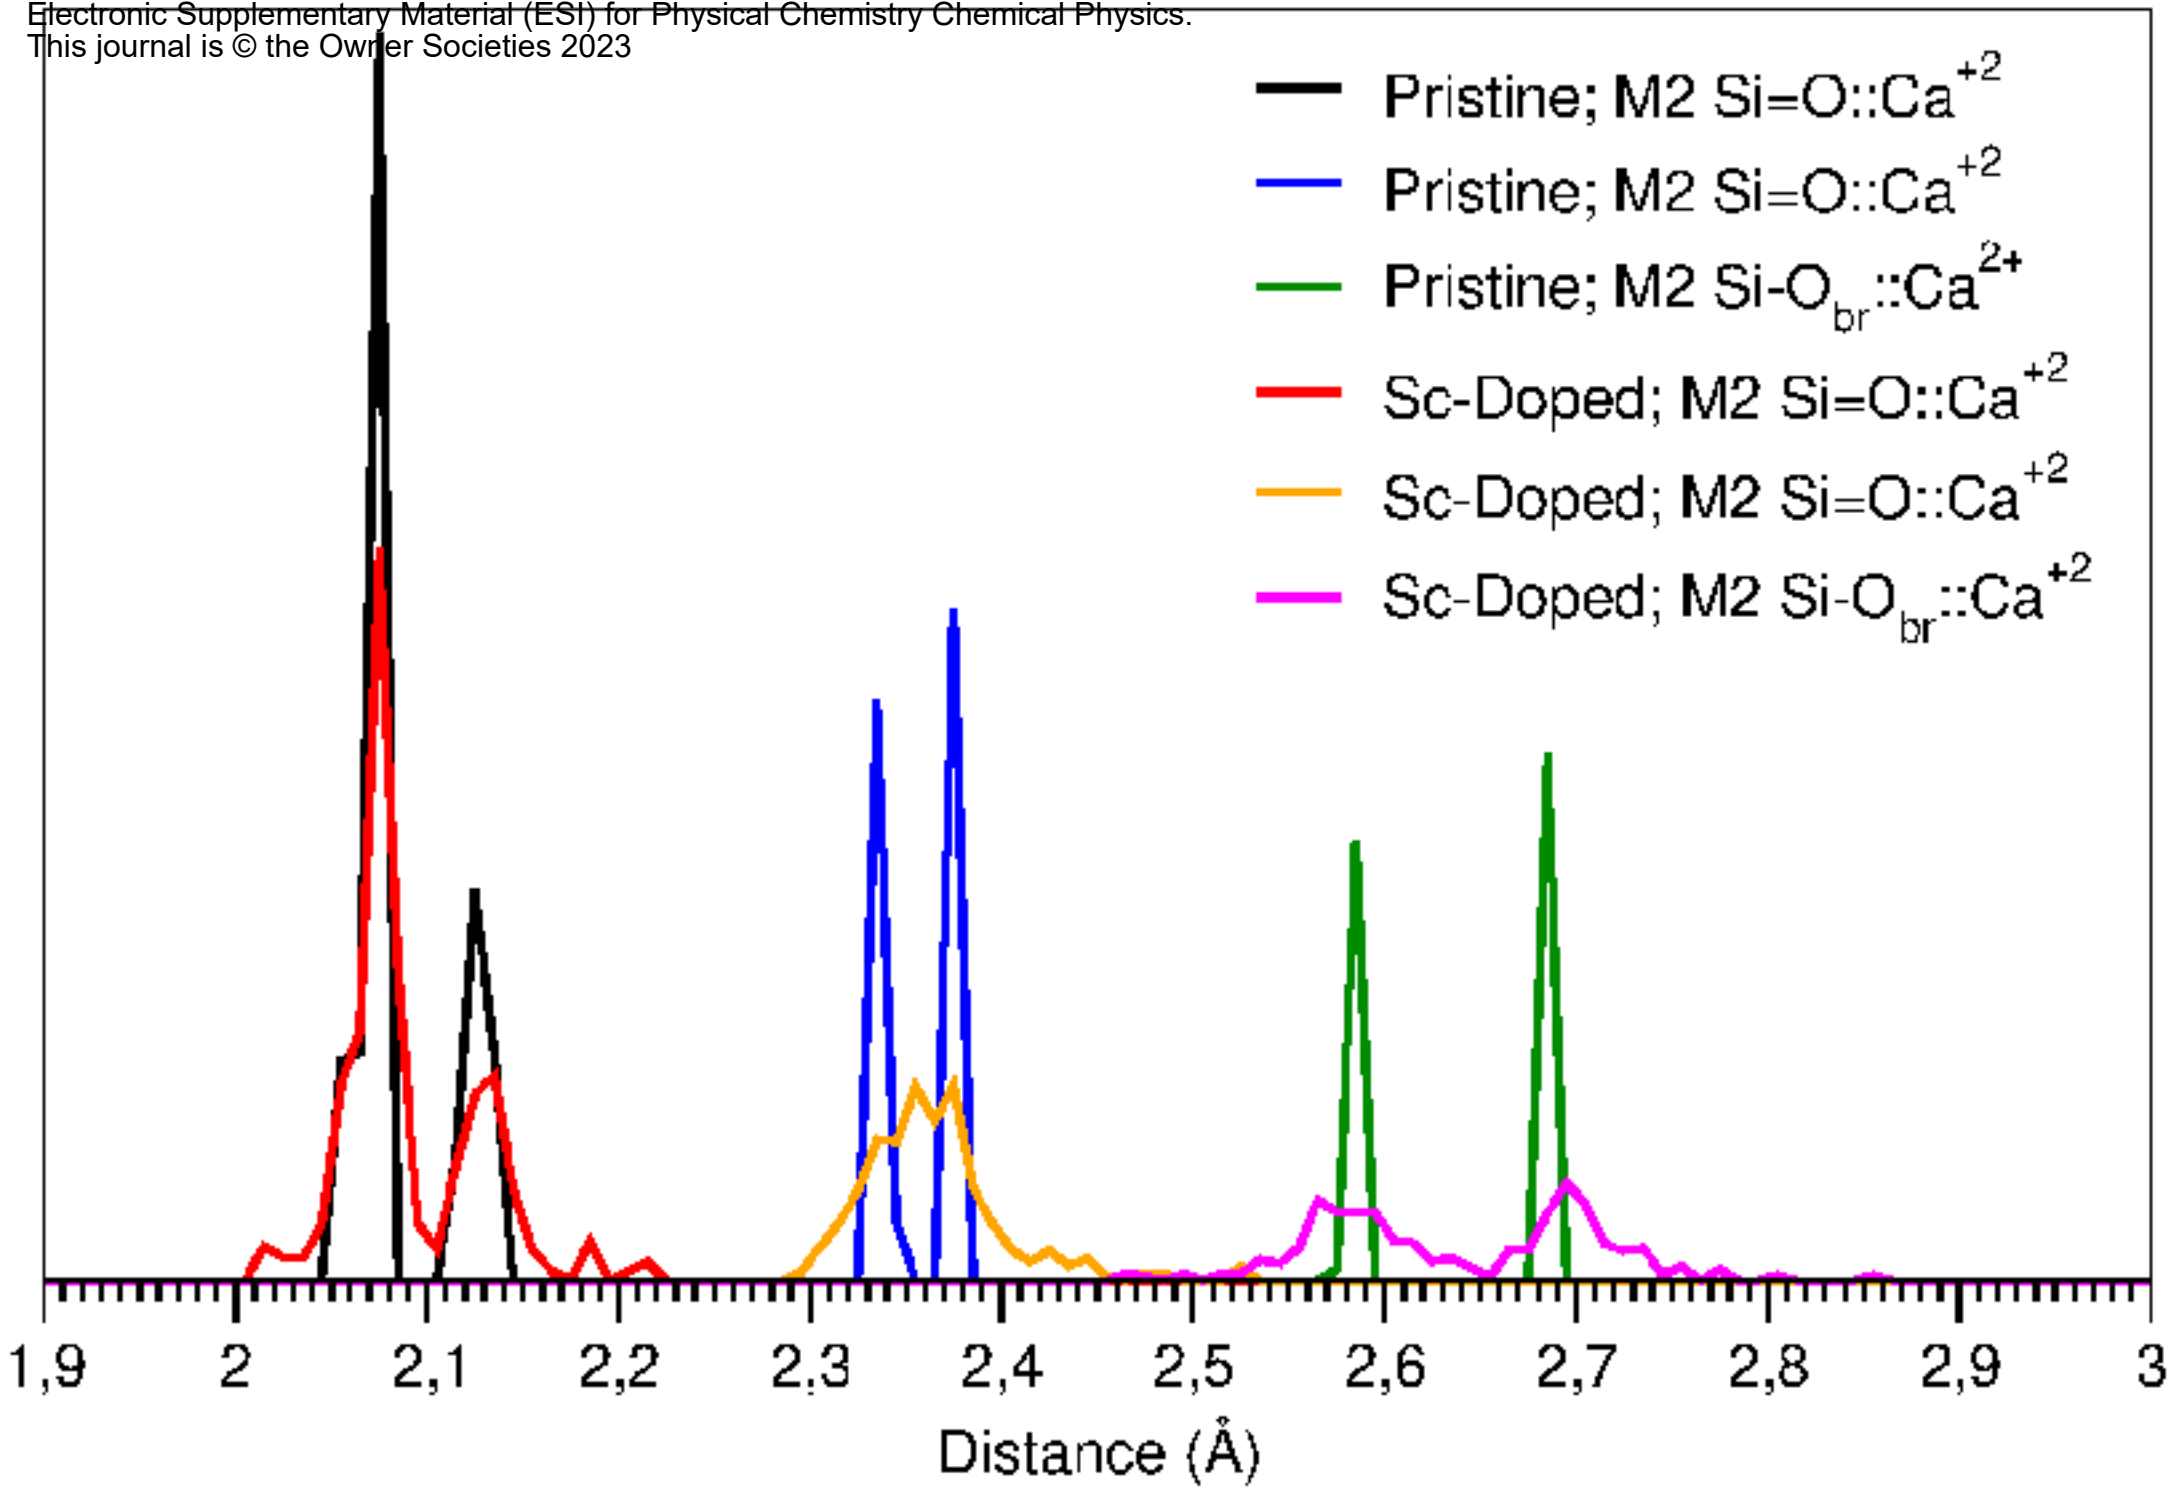

Supplement: d3cp02324a8.pdf [file d3cp02324a8.pdf]
